# Supplementary material for: Prediction of the Binding to Nuclear Factor NF-Kappa-B of Constituents from <em>Teucrium polium</em> L. Essential Oil
Source: Preprints.org preprint supplement (doi:10.20944/preprints202411.0589.v1), 2024-11-08
Supplement: Supplementary file 1 [file supplementary]

Supplementary Material

# Table S1. *Teucrium polium* Smiles molecules

| Molecules | Smiles |
| --- | --- |
| Fenchone | CC1(C2CCC(C2)(C1=O)C)C |
| 3-Carene | CC1=CCC2C(C1)C2(C)C |
| Limonene oxide, cis- | CC(=C)C1CCC2(C(C1)O2)C |
| Myrcene | CC(=CCCC(=C)C=C)C |
| cis-Pinocarveol | CC1(C2CC1C(=C)C(C2)O)C |
| Germacrene D | CC1=CCCC(=C)C=CC(CC1)C(C)C |
| *Myrtenal* | CC1(C2CC=C(C1C2)C=O)C |
| Bicyclogermacrene | CC1=CCCC(=CC2C(C2(C)C)CC1)C |
| Myrtenol | CC1(C2CC=C(C1C2)CO)C |
| Spathulenol | CC1(C2C1C3C(CCC3(C)O)C(=C)CC2)C |
| (Z)-Nerolidyl acetate | CC(=CCCC(=CCCC(C)(C=C)OC(=O)C)C)C |
| δ-Cadinene | CC1=CC2C(CCC(=C2CC1)C)C(C)C |
| β-Ocimene, (E)- | CC(=CCC=C(C)C=C)C |
| Verbenol | CC1=CC(C2CC1C2(C)C)O |

# Table S2. Essential oil composition of aerial parts of *Teucrium polium*

| No | RRI | Referencesa,b | RA (%) | Compounds |
| --- | --- | --- | --- | --- |
| 1 | 946 | 939-957 | 0.40 | Camphene |
| 2 | 953 | 937-953 | 0.26 | Verbenene |
| 3 | 1008 | 997-1027 | 15.77 | 3-Carene |
| 4 | 1009 | 990-1009 | 0.75 | α-Phellandrene |
| 5 | 1055 | 1059-1087 | 31.25 | Fenchone |
| 6 | 1064 | 1027-1050 | 1.02 | β-Ocimene, (E)- |
| 7 | 1089 | 1089 | 0.65 | p-Cymene |
| 8 | 1122 | 1106-1134 | 0.59 | α-Campholenal |
| 9 | 1132 | 1122-1144 | 9.77 | Limonene oxide, cis- |
| 10 | 1140 | 1140-1175 | 9.15 | Myrcene |
| 11 | 1146 | 1146 | 1.02 | Verbenol |
| 12 | 1150 | 1110-1150 | 0.72 | δ-2-Carene |
| 13 | 1160 | 1121-1158 | 0.91 | Pinocarvone |
| 14 | 1162 | 1147-1176 | 0.64 | Linalool oxide |
| 15 | 1165 | 1134-1165 | 0.36 | cis-Verbenol |
| 16 | 1169 | 1122-1169 | 0.80 | 3-Carene |
| 17 | 1182 | 1182 | 2.92 | cis-Pinocarveol |
| 18 | 1186 | 1159-1191 | 0.46 | α -Terpineol |
| 19 | 1194 | 1169-1200 | 1.47 | Myrtenol |
| 20 | 1195 | 1171-1206 | 2.31 | Myrtenal |
| 21 | 1204 | 1190-1224 | 0.38 | Verbenone |
| 22 | 1235 | 1206-1235 | 0.28 | Carvone |
| 23 | 1254 | 1259-1284 | 0.31 | Bornyl acetate |
| 24 | 1270 | 1270-1302 | 0.54 | Terpinen-4-ol acetate |
| 25 | 1290 | 1290-1316 | 0.70 | Myrtenyl acetate |
| 26 | 1484 | 1458-1491 | 2.56 | Germacrene D |
| 27 | 1500 | 1474-1501 | 1.56 | Bicyclogermacrene |
| 28 | 1521 | 1508-1539 | 1.18 | δ-Cadinene |
| 29 | 1577 | 1562-1590 | 1.47 | Spathulenol |
| 30 | 1640 | 1610-1650 | 0.43 | α-Muurolol, epi- |
| 31 | 1649 | 1649-1686 | 0.34 | α-Bisabolol |
| 32 | 1654 | 1619-1662 | 0.35 | α-Cadinol |
| 33 | 1677 | 1676 | 1.30 | (Z)-Nerolidyl acetate |
| Grouped compounds (%)  Monoterpene hydrocarbons 43.15  Oxygenated monoterpenes 43.74  Sesquiterpenes hydrocarbons 5.73  Total identified compounds (%) 92.62 | | | | |

RRI: Relative retention indices, RA (≥0 .25): Relative area (peak area relative to the total peak area). References; (a:Adams, 2017; b:Babushok et al., 2011). Adams, R. P. (2017). Identification of essential oil components by gas chromatography/mass spectrometry. 5 online ed. Gruver, TX USA: Texensis Publishing. Babushok, V. I., Linstrom, P. J., & Zenkevich, I. G. (2011). Retention indices for frequently reported compounds of plant essential oils. Journal of Physical and Chemical Reference Data, 40(4).
